# Supplementary material for: Measures of socioeconomic advantage are not independent predictors of support for healthcare AI: subgroup analysis of a national Australian survey
Source: PubMed Central journal article supplement — BMJ Health Care Inform. 2023 May 31;30(1):e100714. doi: 10.1136/bmjhci-2022-100714 (PMC10254623; doi:10.1136/bmjhci-2022-100714), 2023-05-31
Supplement: bmjhci-2022-100714supp002.pdf [file bmjhci-2022-100714supp002.pdf]

**Supplementary file 1 -. Weighted proportions of the sample who supported the development of AI (aim 1) and applications of HCAI (aim 2).**

|                                                           |                         | Support the development of AI | Support for unexplainable AI in healthcare | Support for HCAI that necessitates data sharing | Support for HCAI that leads to physician deskilling |
|-----------------------------------------------------------|-------------------------|-------------------------------|--------------------------------------------|-------------------------------------------------|-----------------------------------------------------|
|                                                           | <b>ALL</b>              | 56.7%                         | 28.7%                                      | 41.9%                                           | 27.0%                                               |
| Has computer science or programming experience            | No                      | 54.0%                         | 26.1%                                      | 39.9%                                           | 24.8%                                               |
|                                                           | Yes                     | 72.1%                         | 43.4%                                      | 53.1%                                           | 40.0%                                               |
| Self-identifies as having a chronic illness or disability | No                      | 58.1%                         | 29.4%                                      | 42.7%                                           | 27.9%                                               |
|                                                           | Yes                     | 51.6%                         | 26.2%                                      | 39.1%                                           | 24.1%                                               |
| Age group                                                 | 18-34                   | 61.2%                         | 36.4%                                      | 48.4%                                           | 32.9%                                               |
|                                                           | 35-54                   | 55.3%                         | 25.3%                                      | 38.4%                                           | 25.5%                                               |
|                                                           | 55+                     | 53.8%                         | 25.0%                                      | 39.3%                                           | 23.0%                                               |
| Education                                                 | high school ed          | 47.4%                         | 26.7%                                      | 39.4%                                           | 25.8%                                               |
|                                                           | Diploma or trade cert   | 57.4%                         | 26.9%                                      | 38.7%                                           | 21.6%                                               |
|                                                           | Bachelor degree         | 65.6%                         | 32.1%                                      | 46.2%                                           | 32.7%                                               |
|                                                           | Postgraduate degree     | 69.0%                         | 35.9%                                      | 55.5%                                           | 41.9%                                               |
| Speaks languages other than English at home               | No                      | 55.6%                         | 26.9%                                      | 39.9%                                           | 24.4%                                               |
|                                                           | Yes                     | 60.4%                         | 35.3%                                      | 49.1%                                           | 36.4%                                               |
| Gender                                                    | Female                  | 53.9%                         | 25.1%                                      | 38.0%                                           | 22.6%                                               |
|                                                           | Male                    | 59.6%                         | 32.5%                                      | 46.0%                                           | 31.6%                                               |
| Household income                                          | <\$500 pw               | 45.9%                         | 29.7%                                      | 38.6%                                           | 28.2%                                               |
|                                                           | \$500 - \$1999 pw       | 55.6%                         | 27.5%                                      | 41.4%                                           | 24.5%                                               |
|                                                           | \$2000+ pw              | 66.3%                         | 30.5%                                      | 45.2%                                           | 31.6%                                               |
| Region                                                    | Outside of capital city | 54.3%                         | 24.8%                                      | 37.2%                                           | 22.1%                                               |
|                                                           | Capital City            | 57.8%                         | 30.6%                                      | 44.2%                                           | 29.5%                                               |
| SEIFA                                                     | most disadvantage       | 49.9%                         | 27.6%                                      | 38.1%                                           | 25.8%                                               |
|                                                           | moderate                | 56.5%                         | 27.9%                                      | 41.5%                                           | 26.8%                                               |
|                                                           | least disadvantage      | 61.8%                         | 31.7%                                      | 45.5%                                           | 28.3%                                               |
| Self reported health                                      | good/fair/poor          | 52.4%                         | 25.6%                                      | 39.3%                                           | 23.1%                                               |
|                                                           | excellent/very good     | 60.3%                         | 31.3%                                      | 44.1%                                           | 30.4%                                               |
