# Supplementary material for: Measures of socioeconomic advantage are not independent predictors of support for healthcare AI: subgroup analysis of a national Australian survey
Source: PubMed Central journal article supplement — BMJ Health Care Inform. 2023 May 31;30(1):e100714. doi: 10.1136/bmjhci-2022-100714 (PMC10254623; doi:10.1136/bmjhci-2022-100714), 2023-05-31
Supplement: bmjhci-2022-100714supp003.pdf [file bmjhci-2022-100714supp003.pdf]

**Supplementary file 2 - -. Weighted proportions of the sample who felt each aspect of AI-integrated care was very/extremely important.**

|                                                           |                         | Explainability | Speed | Accuracy | Human oversight | Accountability | Reducing costs | Equity |
|-----------------------------------------------------------|-------------------------|----------------|-------|----------|-----------------|----------------|----------------|--------|
|                                                           | <b>ALL</b>              | 76.0%          | 70.3% | 85.0%    | 77.1%           | 78.4%          | 57.9%          | 73.5%  |
| Has computer science or programming experience            | No                      | 76.2%          | 70.9% | 85.0%    | 77.6%           | 78.9%          | 58.0%          | 73.1%  |
|                                                           | Yes                     | 75.1%          | 66.4% | 84.7%    | 74.2%           | 75.2%          | 57.0%          | 76.0%  |
| Self-identifies as having a chronic illness or disability | No                      | 74.6%          | 70.8% | 84.7%    | 75.3%           | 77.7%          | 58.5%          | 72.6%  |
|                                                           | Yes                     | 81.1%          | 68.3% | 85.9%    | 83.2%           | 80.6%          | 55.9%          | 76.8%  |
| Age group                                                 | 18-34                   | 74.4%          | 65.6% | 81.4%    | 71.7%           | 74.9%          | 54.9%          | 69.9%  |
|                                                           | 35-54                   | 74.5%          | 67.9% | 83.7%    | 74.2%           | 76.7%          | 55.9%          | 72.8%  |
|                                                           | 55+                     | 79.0%          | 77.0% | 89.4%    | 85.0%           | 83.1%          | 62.5%          | 77.6%  |
| Education                                                 | high school ed          | 76.7%          | 74.2% | 84.9%    | 78.4%           | 79.9%          | 60.0%          | 75.9%  |
|                                                           | Diploma or trade cert   | 78.7%          | 71.8% | 89.5%    | 81.1%           | 82.3%          | 58.0%          | 75.9%  |
|                                                           | Bachelor degree         | 72.8%          | 64.8% | 81.3%    | 69.7%           | 73.2%          | 55.9%          | 69.4%  |
|                                                           | Postgraduate degree     | 69.2%          | 61.1% | 73.9%    | 71.7%           | 67.1%          | 53.5%          | 64.0%  |
| Speaks languages other than English at home               | No                      | 78.2%          | 71.3% | 87.0%    | 79.6%           | 80.5%          | 57.7%          | 75.9%  |
|                                                           | Yes                     | 68.0%          | 66.4% | 77.7%    | 68.1%           | 70.6%          | 58.6%          | 65.1%  |
| Gender                                                    | Female                  | 76.6%          | 69.4% | 85.1%    | 75.7%           | 77.5%          | 57.6%          | 74.3%  |
|                                                           | Male                    | 75.5%          | 71.2% | 84.8%    | 78.6%           | 79.2%          | 58.2%          | 72.8%  |
| Household income                                          | <\$500 pw               | 74.4%          | 70.4% | 82.7%    | 76.9%           | 77.8%          | 57.8%          | 72.4%  |
|                                                           | \$500 - \$1999 pw       | 76.6%          | 70.4% | 86.0%    | 77.4%           | 79.1%          | 54.8%          | 73.5%  |
|                                                           | \$2000+ pw              | 75.9%          | 70.0% | 84.4%    | 76.5%           | 77.1%          | 64.5%          | 74.4%  |
| Region                                                    | Outside of capital city | 78.7%          | 70.4% | 87.9%    | 80.5%           | 80.4%          | 57.6%          | 75.7%  |
|                                                           | Capital City            | 74.7%          | 70.2% | 83.5%    | 75.4%           | 77.3%          | 58.0%          | 72.5%  |
| SEIFA                                                     | most disadvantage       | 74.9%          | 70.4% | 85.4%    | 78.9%           | 79.0%          | 56.8%          | 76.2%  |
|                                                           | moderate                | 77.1%          | 70.7% | 86.3%    | 78.4%           | 79.1%          | 57.6%          | 73.9%  |
|                                                           | least disadvantage      | 73.9%          | 69.1% | 81.1%    | 72.2%           | 75.9%          | 59.5%          | 70.6%  |
| Self reported health                                      | good/fair/poor          | 72.0%          | 68.7% | 84.3%    | 76.0%           | 75.6%          | 54.0%          | 71.9%  |
|                                                           | excellent/very good     | 79.5%          | 71.7% | 85.5%    | 78.0%           | 80.7%          | 61.2%          | 74.9%  |
